# Supplementary material for: The Clinical Impact of SARS-CoV-2 on Hypertrophic Cardiomyopathy
Source: MDPI journal article supplement (doi:10.3390/jcdd11040104), 2024-03-29
Supplement: s1 [file s1]

**Supplemental table 1.** Standardized mean differences before and after propensity-matching in SARS-CoV2 positive vs. SARS-CoV2 negative.

| Variable                     | Standardized mean differences |                    |
|------------------------------|-------------------------------|--------------------|
|                              | Unmatched                     | Propensity Matched |
| Age                          | -0.05                         | 0.03               |
| BMI                          | 0.12                          | -0.01              |
| Sex                          | 0.12                          | -0.01              |
| Tobacco use                  | -0.05                         | 0                  |
| Hypertension                 | 0.33                          | 0.04               |
| Hyperlipidemia               | 0.20                          | 0                  |
| Myocardial Injury/Infarction | 0.10                          | -0.02              |
| Heart Failure                | 0.05                          | 0.02               |
